# Supplementary material for: In vitro growth environment produces lipidomic and electron transport chain abnormalities in mitochondria from non-tumorigenic astrocytes and brain tumours
Source: PubMed Central journal article supplement — ASN Neuro. 2009 May 27;1(3):e00011. doi: 10.1042/AN20090011 (PMC2695587; doi:10.1042/an20090011), 2009-05-27
Supplement: an001e011add.pdf [file an001e011add.pdf]

# *In vitro* growth environment produces lipidomic and electron transport chain abnormalities in mitochondria from non-tumorigenic astrocytes and brain tumours

Michael A Kiebish\*, Xianlin Han\*, Hua Cheng\* and Thomas N Seyfried<sup>†1</sup>

\*Washington University School of Medicine, Department of Internal Medicine, St Louis, MO 63110, U.S.A.

<sup>†</sup>Boston College, Biology Department, Chestnut Hill, MA 02467, U.S.A.

Cite this article as: Kiebish MA, Han X, Cheng H and Seyfried TN (2009) *In vitro* growth environment produces lipidomic and electron transport chain abnormalities in mitochondria from non-tumorigenic astrocytes and brain tumours. ASN NEURO 1(3):art:e00011.doi:10.1042/AN20090011

---

## SUPPLEMENTARY DATA

---

<sup>1</sup>To whom correspondence should be addressed (email [Thomas.Seyfried@bc.edu](mailto:Thomas.Seyfried@bc.edu)).

© 2009 The Author(s) This is an Open Access article distributed under the terms of the Creative Commons Attribution Non-Commercial Licence (<http://creativecommons.org/licenses/by-nc/2.5/>) which permits unrestricted non-commercial use, distribution and reproduction in any medium, provided the original work is properly cited.

**Table S1** Mass content of ethanolamine glycerophospholipid molecular species of mitochondria isolated from brain, brain tumour and cells  
Values are expressed as mean nmol/mg of protein  $\pm$  S.D. ( $n=3$ ).

| [M-H] <sup>-</sup> | Molecular species | <i>In vivo</i>   |                  |                   | <i>In vitro</i>  |                  |                  |
|--------------------|-------------------|------------------|------------------|-------------------|------------------|------------------|------------------|
|                    |                   | Brain            | CT-2A            | EPEN              | Astrocyte        | CT-2A            | EPEN             |
| 698.5              | P16:0-18:2        |                  | 3.60 $\pm$ 0.33  | 4.00 $\pm$ 0.09   | 2.30 $\pm$ 0.58  | 4.44 $\pm$ 0.89  | 3.31 $\pm$ 0.09  |
| 700.5              | P18:1-16:0        |                  | 5.77 $\pm$ 0.25  | 7.02 $\pm$ 1.03   | 5.66 $\pm$ 1.29  | 8.75 $\pm$ 1.41  | 5.70 $\pm$ 1.15  |
|                    | P16:0-18:1        |                  |                  |                   |                  |                  |                  |
| 702.5              | P18:0-16:0        |                  | 5.41 $\pm$ 0.62  | 5.55 $\pm$ 1.50   | 2.08 $\pm$ 0.50  | 2.81 $\pm$ 0.48  | 2.93 $\pm$ 1.11  |
|                    | P16:0-18:0        |                  |                  |                   |                  |                  |                  |
| 712.5              | D16:1-18:2        |                  | 2.74 $\pm$ 0.26  | 3.80 $\pm$ 0.89   | 1.62 $\pm$ 0.12  | 1.71 $\pm$ 0.36  | 1.60 $\pm$ 0.18  |
| 714.5              | D16:0-18:2        |                  | 7.42 $\pm$ 0.18  | 11.59 $\pm$ 2.58  | 3.33 $\pm$ 0.17  | 2.91 $\pm$ 0.28  | 2.57 $\pm$ 0.14  |
|                    | D16:1-18:1        |                  |                  |                   |                  |                  |                  |
| 716.5              | D16:0-18:1        | 5.11 $\pm$ 1.14  | 8.51 $\pm$ 0.25  | 5.79 $\pm$ 0.22   | 5.15 $\pm$ 0.36  | 4.92 $\pm$ 0.83  | 4.59 $\pm$ 0.47  |
| 718.5              | P14:0-22:6        |                  | 10.64 $\pm$ 0.88 | 4.63 $\pm$ 1.14   | 0.91 $\pm$ 0.20  | 0.89 $\pm$ 0.08  | 1.75 $\pm$ 0.13  |
| 720.5              | P16:1-20:4        |                  | 2.85 $\pm$ 0.20  | 3.45 $\pm$ 0.86   | 2.09 $\pm$ 0.45  | 1.74 $\pm$ 0.20  | 4.84 $\pm$ 0.21  |
|                    | P14:0-22:5        |                  |                  |                   |                  |                  |                  |
| 722.5              | P16:0-20:4        |                  | 4.18 $\pm$ 0.21  | 9.39 $\pm$ 1.56   | 10.53 $\pm$ 2.23 | 6.43 $\pm$ 0.81  | 16.84 $\pm$ 2.73 |
| 724.5              | P16:0-20:3        |                  | 3.33 $\pm$ 0.30  | 5.73 $\pm$ 1.12   | 3.35 $\pm$ 0.82  | 4.19 $\pm$ 0.73  | 2.83 $\pm$ 0.32  |
|                    | P18:1-18:2        |                  |                  |                   |                  |                  |                  |
| 726.5              | P18:1-18:1        |                  | 4.32 $\pm$ 0.19  | 5.62 $\pm$ 0.85   | 2.76 $\pm$ 0.79  | 6.17 $\pm$ 1.46  | 3.30 $\pm$ 0.66  |
|                    | P18:0-18:2        |                  |                  |                   |                  |                  |                  |
|                    | P16:0-20:2        |                  |                  |                   |                  |                  |                  |
| 728.6              | P18:0-18:1        |                  | 5.22 $\pm$ 0.27  | 7.19 $\pm$ 0.36   | 2.54 $\pm$ 0.71  | 5.86 $\pm$ 0.94  | 2.83 $\pm$ 0.55  |
|                    | P16:0-20:1        |                  |                  |                   |                  |                  |                  |
| 730.6              | A18:0-18:1        |                  | 7.55 $\pm$ 0.49  | 6.25 $\pm$ 1.73   | 3.78 $\pm$ 0.12  | 4.31 $\pm$ 0.18  | 3.59 $\pm$ 0.71  |
| 732.5              | D14:1-22:6        |                  | 3.76 $\pm$ 0.30  | 5.09 $\pm$ 1.00   | 0.73 $\pm$ 0.16  | 0.79 $\pm$ 0.04  | 1.09 $\pm$ 0.24  |
| 734.5              | D16:2-20:4        |                  | 3.01 $\pm$ 0.32  | 4.14 $\pm$ 0.56   | 0.65 $\pm$ 0.05  | 0.97 $\pm$ 0.38  | 1.10 $\pm$ 0.12  |
|                    | D14:1-22:5        |                  |                  |                   |                  |                  |                  |
| 736.5              | D16:1-20:4        |                  | 2.80 $\pm$ 0.35  | 5.02 $\pm$ 2.17   | 1.70 $\pm$ 0.04  | 1.29 $\pm$ 0.18  | 1.90 $\pm$ 0.16  |
| 738.5              | D16:0-20:4        |                  | 2.91 $\pm$ 0.07  | 6.15 $\pm$ 1.26   | 3.36 $\pm$ 0.22  | 1.88 $\pm$ 0.13  | 3.04 $\pm$ 0.04  |
|                    | D18:2-18:2        |                  |                  |                   |                  |                  |                  |
| 740.5              | D18:1-18:2        |                  | 4.19 $\pm$ 0.27  | 5.08 $\pm$ 0.44   | 1.57 $\pm$ 0.17  | 1.34 $\pm$ 0.13  | 1.05 $\pm$ 0.18  |
|                    | D16:0-20:3        |                  |                  |                   |                  |                  |                  |
| 742.5              | D18:0-18:2        | 5.07 $\pm$ 0.62  | 10.67 $\pm$ 0.22 | 9.68 $\pm$ 1.73   | 3.75 $\pm$ 0.42  | 4.55 $\pm$ 0.35  | 3.80 $\pm$ 0.64  |
|                    | D18:1-18:1        |                  |                  |                   |                  |                  |                  |
|                    | D16:0-20:2        |                  |                  |                   |                  |                  |                  |
| 744.6              | D18:0-18:1        |                  | 26.64 $\pm$ 3.06 | 75.04 $\pm$ 10.54 | 8.70 $\pm$ 1.04  | 10.12 $\pm$ 1.08 | 10.98 $\pm$ 0.53 |
|                    | D16:0-20:1        |                  |                  |                   |                  |                  |                  |
| 746.5              | P16:0-22:6        | 9.03 $\pm$ 1.39  | 4.24 $\pm$ 0.37  | 7.06 $\pm$ 0.96   | 7.78 $\pm$ 0.91  | 5.26 $\pm$ 0.60  | 8.31 $\pm$ 0.52  |
|                    | D18:0-18:0        |                  |                  |                   |                  |                  |                  |
|                    | P18:2-20:4        |                  |                  |                   |                  |                  |                  |
| 748.5              | P18:1-20:4        |                  | 8.32 $\pm$ 0.52  | 16.59 $\pm$ 3.20  | 14.43 $\pm$ 2.16 | 12.25 $\pm$ 1.02 | 20.43 $\pm$ 2.41 |
|                    | P16:0-22:5        |                  |                  |                   |                  |                  |                  |
| 750.5              | P18:0-20:4        |                  | 5.29 $\pm$ 0.27  | 11.69 $\pm$ 3.40  | 7.63 $\pm$ 1.44  | 6.29 $\pm$ 0.88  | 12.42 $\pm$ 2.16 |
|                    | P16:0-22:4        |                  |                  |                   |                  |                  |                  |
|                    | P18:1-20:3        |                  |                  |                   |                  |                  |                  |
| 752.6              | P18:0-20:3        |                  | 2.98 $\pm$ 0.34  | 6.02 $\pm$ 1.21   | 3.39 $\pm$ 0.48  | 3.66 $\pm$ 0.63  | 2.46 $\pm$ 0.34  |
| 754.6              | P20:1-18:1        |                  | 2.85 $\pm$ 0.34  | 4.09 $\pm$ 0.37   | 1.45 $\pm$ 0.30  | 2.28 $\pm$ 0.52  | 0.99 $\pm$ 0.07  |
|                    | P18:1-20:1        |                  |                  |                   |                  |                  |                  |
| 756.6              | P18:1-20:0        |                  | 3.45 $\pm$ 0.28  | 4.98 $\pm$ 0.36   | 0.81 $\pm$ 0.25  | 1.48 $\pm$ 0.26  | 0.86 $\pm$ 0.18  |
| 758.5              | P20:0-18:0        |                  | 4.70 $\pm$ 0.40  | 6.65 $\pm$ 0.66   | 1.14 $\pm$ 0.16  | 1.56 $\pm$ 0.28  | 1.18 $\pm$ 0.23  |
|                    | P18:0-20:0        |                  |                  |                   |                  |                  |                  |
| 760.5              | D16:1-22:6        |                  | 4.29 $\pm$ 0.29  | 4.54 $\pm$ 0.72   | 1.41 $\pm$ 0.11  | 1.18 $\pm$ 0.18  | 1.12 $\pm$ 0.20  |
| 762.5              | D16:0-22:6        | 9.39 $\pm$ 0.81  | 3.41 $\pm$ 0.27  | 4.96 $\pm$ 0.67   | 2.28 $\pm$ 0.17  | 1.26 $\pm$ 0.27  | 2.84 $\pm$ 0.18  |
| 764.5              | D16:0-22:5        | 8.78 $\pm$ 0.52  | 4.04 $\pm$ 0.47  | 6.62 $\pm$ 0.99   | 4.78 $\pm$ 0.61  | 2.31 $\pm$ 0.49  | 4.35 $\pm$ 0.38  |
|                    | D18:1-20:4        |                  |                  |                   |                  |                  |                  |
| 766.5              | D18:0-20:4        | 37.49 $\pm$ 2.42 | 6.63 $\pm$ 0.67  | 26.35 $\pm$ 8.19  | 14.71 $\pm$ 1.38 | 6.49 $\pm$ 1.60  | 22.87 $\pm$ 1.71 |
|                    | D16:0-22:4        |                  |                  |                   |                  |                  |                  |
| 768.6              | D18:1-20:2        | 11.49 $\pm$ 2.19 | 4.97 $\pm$ 0.19  | 11.26 $\pm$ 2.97  | 6.91 $\pm$ 1.56  | 7.31 $\pm$ 1.06  | 8.73 $\pm$ 0.96  |
|                    | D16:0-22:3        |                  |                  |                   |                  |                  |                  |
|                    | D18:0-20:3        |                  |                  |                   |                  |                  |                  |
| 770.5              | P18:2-22:6        |                  | 3.87 $\pm$ 0.30  | 5.18 $\pm$ 0.62   | 0.85 $\pm$ 0.23  | 1.29 $\pm$ 0.10  | 0.91 $\pm$ 0.11  |
|                    | D18:1-20:1        |                  |                  |                   |                  |                  |                  |
| 772.5              | P18:1-22:6        |                  | 5.24 $\pm$ 0.48  | 7.32 $\pm$ 1.24   | 3.19 $\pm$ 0.45  | 2.53 $\pm$ 0.50  | 3.17 $\pm$ 0.06  |
|                    | D18:0-20:1        |                  |                  |                   |                  |                  |                  |
| 774.5              | P18:0-22:6        | 10.37 $\pm$ 1.44 | 7.31 $\pm$ 0.62  | 9.00 $\pm$ 1.75   | 4.51 $\pm$ 1.00  | 4.96 $\pm$ 0.73  | 5.04 $\pm$ 0.48  |
|                    | P18:1-22:5        |                  |                  |                   |                  |                  |                  |
|                    | D18:0-20:0        |                  |                  |                   |                  |                  |                  |
| 776.6              | P18:0-22:5        | 7.29 $\pm$ 2.19  | 5.85 $\pm$ 0.69  | 9.25 $\pm$ 1.95   | 3.95 $\pm$ 0.55  | 3.98 $\pm$ 0.19  | 6.01 $\pm$ 0.64  |
|                    | P18:1-22:4        |                  |                  |                   |                  |                  |                  |
| 778.6              | P18:0-22:4        | 2.23 $\pm$ 0.52  | 3.27 $\pm$ 0.31  | 6.47 $\pm$ 1.86   | 2.52 $\pm$ 0.41  | 2.29 $\pm$ 0.23  | 4.25 $\pm$ 0.71  |
|                    | P20:0-20:4        |                  |                  |                   |                  |                  |                  |
|                    | P18:1-22:3        |                  |                  |                   |                  |                  |                  |

Table S1 Continued

| [M-H] <sup>-</sup> | Molecular species                      | <i>In vivo</i> |             |              | <i>In vitro</i> |             |             |
|--------------------|----------------------------------------|----------------|-------------|--------------|-----------------|-------------|-------------|
|                    |                                        | Brain          | CT-2A       | EPEN         | Astrocyte       | CT-2A       | EPEN        |
| 780.6              | A20:0-20:4<br>P18:0-22:3               |                | 3.52 ± 0.41 | 12.35 ± 4.21 | 2.47 ± 0.39     | 2.87 ± 0.60 | 3.10 ± 0.70 |
| 782.6              | P18:0-22:2                             |                | 3.24 ± 0.26 | 6.32 ± 0.98  | 1.53 ± 0.45     | 2.24 ± 0.40 | 1.51 ± 0.27 |
| 786.5              | D18:2-22:6                             |                | 4.47 ± 0.26 | 5.48 ± 0.95  | 0.73 ± 0.22     | 1.09 ± 0.28 | 0.85 ± 0.16 |
| 788.5              | D18:1-22:6                             | 5.95 ± 0.44    | 5.94 ± 0.46 | 5.65 ± 1.14  | 2.65 ± 0.15     | 2.11 ± 0.26 | 2.01 ± 0.37 |
| 790.5              | D18:0-22:6<br>D18:1-22:5               | 58.18 ± 1.87   | 4.44 ± 0.57 | 10.33 ± 2.43 | 5.30 ± 0.46     | 3.13 ± 0.91 | 5.74 ± 0.17 |
| 792.6              | D18:1-22:4<br>D18:0-22:5               | 3.62 ± 0.29    | 4.29 ± 0.30 | 9.48 ± 2.21  | 4.58 ± 0.16     | 3.20 ± 0.22 | 4.34 ± 0.20 |
| 794.6              | D20:0-20:4<br>D18:1-22:3<br>D18:0-22:4 | 6.53 ± 0.46    | 5.63 ± 0.28 | 16.42 ± 7.29 | 4.11 ± 0.37     | 4.24 ± 0.23 | 5.81 ± 0.68 |
| 796.6              | D20:0-20:3<br>D18:0-22:3               | 6.85 ± 1.34    | 4.18 ± 0.35 | 9.51 ± 2.42  | 1.74 ± 0.41     | 1.64 ± 0.14 | 2.09 ± 0.18 |
| 798.6              | D20:0-20:2<br>D18:0-22:2               |                | 4.02 ± 0.50 | 5.83 ± 0.60  |                 |             |             |

**Table S2** Mass content of choline glycerophospholipid molecular species of mitochondria isolated from brain, brain tumour and cells  
Values are expressed as mean nmol/mg of protein  $\pm$  S.D. ( $n=3$ ).

| [M+Li] <sup>+</sup> | Molecular species | In vivo          |                  |                  | In vitro         |                  |                  |
|---------------------|-------------------|------------------|------------------|------------------|------------------|------------------|------------------|
|                     |                   | Brain            | CT-2A            | EPEN             | Astrocyte        | CT-2A            | EPEN             |
| 698.6               | A14:0-16:0        |                  | 0.57 $\pm$ 0.03  | 0.59 $\pm$ 0.30  | 0.63 $\pm$ 0.19  | 0.50 $\pm$ 0.07  | 0.11 $\pm$ 0.02  |
| 710.5               | D14:0-16:1        |                  | 2.63 $\pm$ 0.11  | 2.43 $\pm$ 1.24  | 4.55 $\pm$ 0.83  | 5.54 $\pm$ 0.72  | 5.14 $\pm$ 0.64  |
| 712.5               | D14:0-16:0        | 0.35 $\pm$ 0.11  | 3.79 $\pm$ 0.53  | 2.19 $\pm$ 0.27  | 4.79 $\pm$ 0.68  | 6.09 $\pm$ 1.14  | 4.52 $\pm$ 0.25  |
| 722.6               | P16:0-16:1        | 0.04 $\pm$ 0.07  | 0.40 $\pm$ 0.07  | 0.52 $\pm$ 0.18  | 0.40 $\pm$ 0.09  | 0.17 $\pm$ 0.01  | 0.09 $\pm$ 0.03  |
|                     | P16:1-16:0        |                  |                  |                  |                  |                  |                  |
|                     | P18:1-14:0        |                  |                  |                  |                  |                  |                  |
| 724.6               | P16:0-16:0        | 0.09 $\pm$ 0.02  | 0.76 $\pm$ 0.07  | 0.74 $\pm$ 0.44  | 2.73 $\pm$ 0.20  | 1.41 $\pm$ 0.23  | 0.45 $\pm$ 0.12  |
|                     | A16:0-16:1        |                  |                  |                  |                  |                  |                  |
| 726.6               | A16:0-16:0        | 0.11 $\pm$ 0.10  | 1.17 $\pm$ 0.07  | 0.84 $\pm$ 0.39  | 1.98 $\pm$ 0.36  | 1.64 $\pm$ 0.17  | 1.14 $\pm$ 0.16  |
| 736.5               | D16:1-16:1        | 0.31 $\pm$ 0.15  | 0.98 $\pm$ 0.31  | 1.72 $\pm$ 0.58  | 2.82 $\pm$ 0.92  | 0.79 $\pm$ 0.13  | 0.68 $\pm$ 0.04  |
|                     | D14:1-18:1        |                  |                  |                  |                  |                  |                  |
| 738.6               | D16:1-16:0        | 2.39 $\pm$ 0.44  | 6.83 $\pm$ 0.06  | 9.44 $\pm$ 2.65  | 19.79 $\pm$ 2.15 | 11.95 $\pm$ 1.72 | 8.52 $\pm$ 0.57  |
|                     | D14:1-18:0        |                  |                  |                  |                  |                  |                  |
| 740.6               | D16:0-16:0        | 10.00 $\pm$ 1.27 | 4.14 $\pm$ 0.62  | 4.56 $\pm$ 1.63  | 4.55 $\pm$ 0.85  | 6.56 $\pm$ 1.01  | 11.67 $\pm$ 1.74 |
| 748.6               | P16:0-18:2        | 0.00 $\pm$ 0.00  | 0.20 $\pm$ 0.06  | 0.25 $\pm$ 0.08  | 0.14 $\pm$ 0.04  | 0.07 $\pm$ 0.01  | 0.03 $\pm$ 0.01  |
|                     | A16:0-18:3        |                  |                  |                  |                  |                  |                  |
| 750.6               | P16:0-18:1        | 0.05 $\pm$ 0.08  | 0.68 $\pm$ 0.09  | 0.67 $\pm$ 0.07  | 1.26 $\pm$ 0.15  | 0.64 $\pm$ 0.04  | 0.19 $\pm$ 0.02  |
|                     | P18:1-16:0        |                  |                  |                  |                  |                  |                  |
| 752.6               | P16:0-18:0        | 0.22 $\pm$ 0.06  | 1.68 $\pm$ 0.07  | 1.17 $\pm$ 0.50  | 4.21 $\pm$ 0.23  | 2.48 $\pm$ 0.11  | 1.29 $\pm$ 0.05  |
|                     | P18:0-16:0        |                  |                  |                  |                  |                  |                  |
|                     | A18:1-16:0        |                  |                  |                  |                  |                  |                  |
|                     | A16:0-18:1        |                  |                  |                  |                  |                  |                  |
| 760.5               | D14:1-20:3        | 0.13 $\pm$ 0.06  | 0.13 $\pm$ 0.16  | 0.60 $\pm$ 0.21  | 0.09 $\pm$ 0.16  | 0.04 $\pm$ 0.06  | 0.01 $\pm$ 0.02  |
|                     | D16:2-18:2        |                  |                  |                  |                  |                  |                  |
|                     | D14:0-20:4        |                  |                  |                  |                  |                  |                  |
| 762.6               | D16:1-18:2        | 0.15 $\pm$ 0.10  | 0.56 $\pm$ 0.36  | 1.25 $\pm$ 0.15  | 0.73 $\pm$ 0.42  | 0.20 $\pm$ 0.06  | 0.21 $\pm$ 0.05  |
| 764.6               | D16:0-18:2        | 1.71 $\pm$ 0.26  | 6.81 $\pm$ 1.24  | 12.64 $\pm$ 3.06 | 8.07 $\pm$ 1.50  | 4.26 $\pm$ 0.02  | 3.20 $\pm$ 0.18  |
| 766.6               | D16:0-18:1        | 33.31 $\pm$ 1.31 | 15.43 $\pm$ 0.14 | 19.67 $\pm$ 4.31 | 27.74 $\pm$ 4.55 | 23.21 $\pm$ 3.65 | 30.82 $\pm$ 2.08 |
| 768.6               | D16:0-18:0        | 2.47 $\pm$ 0.26  | 1.50 $\pm$ 0.09  | 1.55 $\pm$ 0.33  | 1.25 $\pm$ 0.23  | 1.88 $\pm$ 0.18  | 2.26 $\pm$ 0.21  |
| 772.6               | P18:2-18:2        | 0.03 $\pm$ 0.05  | 0.16 $\pm$ 0.16  | 0.28 $\pm$ 0.09  | 0.56 $\pm$ 0.07  | 0.72 $\pm$ 0.33  | 0.27 $\pm$ 0.04  |
|                     | P16:0-20:4        |                  |                  |                  |                  |                  |                  |
|                     | P20:4-16:0        |                  |                  |                  |                  |                  |                  |
| 774.6               | A16:0-20:4        | 0.05 $\pm$ 0.04  | 0.13 $\pm$ 0.10  | 0.71 $\pm$ 0.33  | 0.35 $\pm$ 0.21  | 0.09 $\pm$ 0.04  | 0.14 $\pm$ 0.02  |
| 776.6               | P18:1-18:1        | 0.00 $\pm$ 0.00  | 0.42 $\pm$ 0.08  | 0.53 $\pm$ 0.10  | 0.67 $\pm$ 0.09  | 0.33 $\pm$ 0.08  | 0.15 $\pm$ 0.02  |
| 778.6               | P18:1-18:0        | 0.10 $\pm$ 0.05  | 2.96 $\pm$ 0.38  | 1.64 $\pm$ 0.55  | 2.04 $\pm$ 0.26  | 1.23 $\pm$ 0.15  | 0.82 $\pm$ 0.07  |
| 780.6               | A18:0-18:1        | 0.59 $\pm$ 0.05  | 6.20 $\pm$ 0.48  | 5.70 $\pm$ 1.80  | 4.17 $\pm$ 0.73  | 2.17 $\pm$ 0.27  | 1.84 $\pm$ 0.24  |
|                     | P18:0-18:0        |                  |                  |                  |                  |                  |                  |
| 782.7               | A16:0-20:0        | 7.42 $\pm$ 2.81  | 10.50 $\pm$ 2.02 | 7.83 $\pm$ 3.11  | 8.03 $\pm$ 1.41  | 5.02 $\pm$ 0.55  | 5.39 $\pm$ 0.78  |
| 786.6               | D18:2-18:3        | 0.53 $\pm$ 0.12  | 0.15 $\pm$ 0.23  | 1.24 $\pm$ 0.37  | 0.27 $\pm$ 0.46  | 0.06 $\pm$ 0.10  | 0.74 $\pm$ 0.06  |
|                     | D16:1-20:4        |                  |                  |                  |                  |                  |                  |
| 788.6               | D16:0-20:4        | 23.37 $\pm$ 1.28 | 1.26 $\pm$ 0.72  | 14.32 $\pm$ 4.61 | 2.69 $\pm$ 1.60  | 0.58 $\pm$ 0.13  | 11.31 $\pm$ 2.25 |
|                     | D18:2-18:2        |                  |                  |                  |                  |                  |                  |
| 790.6               | D18:1-18:2        | 1.07 $\pm$ 0.14  | 2.34 $\pm$ 0.62  | 7.36 $\pm$ 1.38  | 2.91 $\pm$ 0.25  | 1.44 $\pm$ 0.00  | 2.66 $\pm$ 0.12  |
|                     | D16:0-20:3        |                  |                  |                  |                  |                  |                  |
| 792.6               | D18:0-18:2        | 4.15 $\pm$ 0.42  | 10.21 $\pm$ 0.21 | 13.36 $\pm$ 2.61 | 11.27 $\pm$ 3.30 | 13.57 $\pm$ 1.77 | 10.89 $\pm$ 1.04 |
|                     | D18:1-18:1        |                  |                  |                  |                  |                  |                  |
| 794.6               | D18:0-18:1        | 4.38 $\pm$ 0.46  | 6.68 $\pm$ 0.71  | 6.87 $\pm$ 1.05  | 12.62 $\pm$ 4.63 | 11.74 $\pm$ 4.33 | 15.00 $\pm$ 1.89 |
| 796.6               | D18:0-18:0        | 0.08 $\pm$ 0.07  | 3.69 $\pm$ 0.74  | 1.12 $\pm$ 0.52  | 1.14 $\pm$ 0.37  | 0.68 $\pm$ 0.16  | 0.68 $\pm$ 0.17  |
| 798.6               | P18:1-20:4        | 0.07 $\pm$ 0.01  | 0.54 $\pm$ 0.35  | 0.39 $\pm$ 0.16  | 1.34 $\pm$ 0.24  | 0.85 $\pm$ 0.24  | 0.41 $\pm$ 0.11  |
| 800.6               | P18:0-20:4        | 0.07 $\pm$ 0.01  | 0.36 $\pm$ 0.04  | 0.68 $\pm$ 0.30  | 5.61 $\pm$ 2.88  | 4.71 $\pm$ 0.18  | 0.93 $\pm$ 0.23  |
| 802.6               | P18:2-20:1        | 0.27 $\pm$ 0.10  | 0.39 $\pm$ 0.11  | 0.92 $\pm$ 0.30  | 0.86 $\pm$ 0.29  | 0.26 $\pm$ 0.06  | 1.39 $\pm$ 0.14  |
|                     | P20:1-18:2        |                  |                  |                  |                  |                  |                  |
|                     | A18:0-20:4        |                  |                  |                  |                  |                  |                  |
| 810.7               | A18:0-20:0        | 0.91 $\pm$ 0.23  | 3.12 $\pm$ 1.66  | 2.65 $\pm$ 1.24  | 2.53 $\pm$ 1.48  | 1.39 $\pm$ 0.50  | 1.33 $\pm$ 0.03  |
| 812.6               | D16:0-22:6        | 13.94 $\pm$ 0.79 | 0.78 $\pm$ 0.86  | 4.58 $\pm$ 1.59  | 1.21 $\pm$ 1.19  | 0.35 $\pm$ 0.39  | 6.65 $\pm$ 1.98  |
|                     | D18:2-20:4        |                  |                  |                  |                  |                  |                  |
| 814.6               | D18:1-20:4        | 5.66 $\pm$ 0.72  | 0.68 $\pm$ 0.43  | 5.23 $\pm$ 1.60  | 2.76 $\pm$ 1.00  | 0.85 $\pm$ 0.03  | 13.27 $\pm$ 2.42 |
|                     | D16:0-22:5        |                  |                  |                  |                  |                  |                  |
| 816.6               | D18:2-20:2        | 11.36 $\pm$ 0.90 | 1.86 $\pm$ 0.15  | 9.56 $\pm$ 2.11  | 6.12 $\pm$ 0.74  | 2.05 $\pm$ 0.16  | 26.50 $\pm$ 4.26 |
|                     | D18:0-20:4        |                  |                  |                  |                  |                  |                  |
| 818.6               | D18:0-20:3        | 0.36 $\pm$ 0.17  | 1.03 $\pm$ 0.09  | 1.56 $\pm$ 0.80  | 1.59 $\pm$ 0.49  | 1.98 $\pm$ 0.20  | 0.45 $\pm$ 0.76  |
| 820.6               | D18:0-20:2        | 0.16 $\pm$ 0.03  | 2.17 $\pm$ 0.31  | 1.21 $\pm$ 0.70  | 0.57 $\pm$ 0.11  | 1.89 $\pm$ 0.19  | 0.43 $\pm$ 0.37  |
|                     | P18:2-22:6        |                  |                  |                  |                  |                  |                  |
| 822.7               | D18:0-20:1        | 0.10 $\pm$ 0.09  | 3.14 $\pm$ 0.63  | 0.89 $\pm$ 0.82  | 0.12 $\pm$ 0.10  | 0.08 $\pm$ 0.14  | 0.00 $\pm$ 0.00  |
|                     | P18:1-22:6        |                  |                  |                  |                  |                  |                  |
| 824.6               | P18:0-22:6        | 0.02 $\pm$ 0.02  | 1.63 $\pm$ 0.63  | 0.36 $\pm$ 0.34  | 0.87 $\pm$ 0.19  | 0.44 $\pm$ 0.08  | 0.35 $\pm$ 0.08  |
|                     | P18:1-22:5        |                  |                  |                  |                  |                  |                  |
| 826.6               | A18:0-22:6        | 0.05 $\pm$ 0.05  | 0.70 $\pm$ 0.12  | 0.25 $\pm$ 0.19  | 4.23 $\pm$ 2.12  | 3.37 $\pm$ 0.57  | 0.88 $\pm$ 0.42  |
|                     | P18:0-22:5        |                  |                  |                  |                  |                  |                  |
| 836.6               | D18:2-22:6        | 0.12 $\pm$ 0.11  | 0.58 $\pm$ 0.75  | 0.75 $\pm$ 0.69  |                  |                  | 0.66 $\pm$ 0.15  |

Table S2 Continued

| [M+Li] <sup>+</sup> | Molecular species | <i>In vivo</i> |             |             | <i>In vitro</i> |             |             |
|---------------------|-------------------|----------------|-------------|-------------|-----------------|-------------|-------------|
|                     |                   | Brain          | CT-2A       | EPEN        | Astrocyte       | CT-2A       | EPEN        |
| 838.6               | D18:1-22:6        | 1.29 ± 1.15    | 0.71 ± 0.45 | 0.73 ± 0.28 | 1.05 ± 0.52     | 0.43 ± 0.00 | 3.71 ± 0.92 |
| 840.6               | D18:2-22:5        | 2.07 ± 1.96    | 0.88 ± 0.17 | 1.31 ± 0.32 | 2.48 ± 0.64     | 1.01 ± 0.15 | 7.86 ± 2.79 |
|                     | D20:2-20:4        |                |             |             |                 |             |             |
| 842.6               | D18:0-22:5        | 0.20 ± 0.18    | 0.53 ± 0.03 | 0.70 ± 0.31 | 1.85 ± 0.18     | 0.81 ± 0.18 | 4.53 ± 1.57 |
|                     | D20:2-20:3        |                |             |             |                 |             |             |
| 844.6               | D18:0-22:4        | 0.14 ± 0.14    | 0.75 ± 0.20 | 0.61 ± 0.31 | 0.83 ± 0.49     | 0.57 ± 0.18 | 1.16 ± 0.26 |
|                     | D20:0-20:4        |                |             |             |                 |             |             |
| 846.7               | D20:2-20:2        |                | 0.84 ± 0.36 | 0.31 ± 0.33 | 0.22 ± 0.12     | 0.12 ± 0.09 | 0.02 ± 0.02 |
|                     | D18:0-22:3        |                |             |             |                 |             |             |
| 848.7               | D18:2-22:1        |                | 0.84 ± 0.29 | 0.29 ± 0.32 | 0.50 ± 0.22     | 0.18 ± 0.04 | 0.11 ± 0.02 |
|                     | D18:0-22:2        |                |             |             |                 |             |             |
| 850.6               | D20:0-20:2        |                | 0.64 ± 0.08 | 0.12 ± 0.21 | 0.20 ± 0.11     | 0.22 ± 0.13 | 0.10 ± 0.05 |
|                     | P20:1-22:6        |                |             |             |                 |             |             |
| 854.7               | P20:1-22:4        |                | 0.63 ± 0.29 | 0.12 ± 0.20 | 0.38 ± 0.10     | 0.35 ± 0.08 | 0.34 ± 0.11 |
| 860.7               | P20:0-22:2        |                | 0.65 ± 0.20 | 0.16 ± 0.29 |                 |             | 0.70 ± 0.09 |
| 862.7               | P20:0-22:1        |                | 0.86 ± 0.18 | 0.19 ± 0.33 |                 |             | 0.45 ± 0.09 |
| 864.6               | P21:1-22:6        |                | 1.04 ± 0.45 | 0.09 ± 0.16 | 0.13 ± 0.03     | 0.07 ± 0.02 | 0.28 ± 0.04 |
| 866.7               | P21:1-22:5        |                | 0.51 ± 0.14 | 0.06 ± 0.10 | 0.14 ± 0.03     | 0.09 ± 0.03 | 0.42 ± 0.08 |
| 868.7               | P21:1-22:4        |                | 0.26 ± 0.07 | 0.05 ± 0.09 | 0.10 ± 0.01     | 0.09 ± 0.03 | 0.39 ± 0.05 |
| 870.7               | D20:0-22:5        |                | 0.36 ± 0.13 | 0.05 ± 0.09 |                 |             | 0.31 ± 0.11 |
|                     | D20:1-22:4        |                |             |             |                 |             |             |
| 872.7               | D20:0-22:4        |                | 0.23 ± 0.05 | 0.06 ± 0.10 |                 |             | 0.14 ± 0.02 |
|                     | D20:2-22:2        |                |             |             |                 |             |             |
| 874.7               | D20:0-22:3        |                | 0.29 ± 0.05 | 0.06 ± 0.11 |                 |             | 0.12 ± 0.08 |
|                     | D20:2-22:1        |                |             |             |                 |             |             |
| 876.7               | D20:0-22:2        |                | 0.40 ± 0.12 | 0.07 ± 0.12 | 0.30 ± 0.12     | 0.12 ± 0.02 | 0.10 ± 0.05 |
|                     | D20:2-22:0        |                |             |             |                 |             |             |
| 878.7               | D20:0-22:1        |                | 0.44 ± 0.06 | 0.10 ± 0.16 | 0.11 ± 0.06     | 0.07 ± 0.02 | 0.13 ± 0.05 |
| 880.7               | D20:0-22:0        |                | 0.38 ± 0.08 | 0.07 ± 0.13 |                 |             | 0.05 ± 0.02 |

**Table S3** Mass content of cardiolipin molecular species of mitochondria isolated from brain, brain tumour and cells  
 Values are expressed as mean nmol/mg of protein  $\pm$  S.D. ( $n=3$ ). The *in vivo* values are taken from Kiebish et al., 2008a (see the reference list in the main paper).

| [M-2H] <sup>-</sup> | Molecular species     | <i>In vivo</i>  |                 |                 | <i>In vitro</i> |                 |                 |
|---------------------|-----------------------|-----------------|-----------------|-----------------|-----------------|-----------------|-----------------|
|                     |                       | Brain           | CT-2A           | EPEN            | Astrocyte       | CT-2A           | EPEN            |
| 685.0               | 18:1-16:1-16:1-16:1   |                 |                 | 0.04 $\pm$ 0.01 | 0.65 $\pm$ 0.41 | 0.29 $\pm$ 0.11 | 0.86 $\pm$ 0.24 |
| 686.0               | 18:1-16:1-16:1-16:0   |                 | 1.31 $\pm$ 0.03 |                 | 1.42 $\pm$ 0.12 | 0.73 $\pm$ 0.18 | 0.24 $\pm$ 0.06 |
| 687.0               | 18:1-16:1-16:0-16:0   |                 | 1.06 $\pm$ 0.26 |                 | 0.88 $\pm$ 0.24 | 0.72 $\pm$ 0.05 | 0.48 $\pm$ 0.03 |
| 699.0               | 18:2-18:1-16:1-16:1   |                 | 1.14 $\pm$ 0.12 | 0.17 $\pm$ 0.01 | 1.16 $\pm$ 0.29 | 0.97 $\pm$ 0.44 | 0.42 $\pm$ 0.07 |
| 700.0               | 18:1-18:1-16:1-16:1   | 0.30 $\pm$ 0.03 | 1.33 $\pm$ 0.34 | 0.26 $\pm$ 0.05 | 3.60 $\pm$ 0.47 | 2.13 $\pm$ 0.48 | 0.99 $\pm$ 0.08 |
| 701.0               | 18:1-18:1-16:0-16:1   | 0.31 $\pm$ 0.05 | 1.08 $\pm$ 0.23 | 0.32 $\pm$ 0.07 | 1.58 $\pm$ 0.15 | 1.05 $\pm$ 0.03 | 1.05 $\pm$ 0.08 |
|                     | 18:2-18:1-16:0-16:0   |                 |                 |                 |                 |                 |                 |
|                     | 18:2-18:0-16:1-16:0   |                 |                 |                 |                 |                 |                 |
| 702.0               | 18:1-18:1-16:0-16:0   | 0.24 $\pm$ 0.04 | 0.87 $\pm$ 0.17 | 0.44 $\pm$ 0.11 | 0.85 $\pm$ 0.12 | 0.59 $\pm$ 0.08 | 0.96 $\pm$ 0.12 |
|                     | 18:2-18:0-16:0-16:0   |                 |                 |                 |                 |                 |                 |
|                     | 18:1-18:0-16:0-16:1   |                 |                 |                 |                 |                 |                 |
| 710.0               | 20:4-18:2-16:1-16:1   | 0.09 $\pm$ 0.01 |                 | 0.17 $\pm$ 0.07 | 0.25 $\pm$ 0.02 | 0.12 $\pm$ 0.03 | 0.16 $\pm$ 0.03 |
| 711.0               | 20:4-18:1-16:1-16:1   | 0.41 $\pm$ 0.06 | 1.25 $\pm$ 0.17 | 0.24 $\pm$ 0.01 | 0.58 $\pm$ 0.12 | 0.31 $\pm$ 0.10 | 0.30 $\pm$ 0.01 |
|                     | 20:4-18:2-16:1-16:0   |                 |                 |                 |                 |                 |                 |
| 712.0               | 20:4-18:1-16:1-16:0   | 0.45 $\pm$ 0.06 | 1.62 $\pm$ 0.11 | 0.46 $\pm$ 0.09 | 0.82 $\pm$ 0.15 | 0.84 $\pm$ 0.37 | 0.65 $\pm$ 0.06 |
|                     | 18:2-18:2-18:1-16:1   |                 |                 |                 |                 |                 |                 |
| 713.0               | 18:2-18:1-18:1-16:1   | 0.71 $\pm$ 0.02 | 1.91 $\pm$ 0.07 | 0.73 $\pm$ 0.17 | 2.31 $\pm$ 0.57 | 2.26 $\pm$ 0.66 | 1.92 $\pm$ 0.18 |
|                     | 18:1-18:1-18:1-16:2   |                 |                 |                 |                 |                 |                 |
|                     | 18:2-18:1-18:0-16:2   |                 |                 |                 |                 |                 |                 |
|                     | 18:2-18:2-18:0-16:1   |                 |                 |                 |                 |                 |                 |
| 714.0               | 18:1-18:1-18:1-16:1   | 1.47 $\pm$ 0.23 | 2.00 $\pm$ 0.63 | 0.75 $\pm$ 0.15 | 2.55 $\pm$ 0.42 | 2.32 $\pm$ 0.36 | 2.38 $\pm$ 0.37 |
|                     | 18:2-18:1-18:1-16:0   |                 |                 |                 |                 |                 |                 |
| 715.0               | 18:1-18:1-18:1-16:0   | 0.68 $\pm$ 0.04 | 1.57 $\pm$ 0.30 | 0.39 $\pm$ 0.08 | 0.59 $\pm$ 0.04 | 0.64 $\pm$ 0.06 | 1.33 $\pm$ 0.13 |
|                     | 18:0-18:1-18:1-16:1   |                 |                 |                 |                 |                 |                 |
| 716.0               | 18:0-18:1-18:1-16:0   | 0.09 $\pm$ 0.02 |                 | 0.17 $\pm$ 0.05 | 0.24 $\pm$ 0.02 | 0.21 $\pm$ 0.03 | 0.24 $\pm$ 0.05 |
|                     | 18:0-18:0-18:1-16:1   |                 |                 |                 |                 |                 |                 |
| 720.0               | 0-20:4-18:1-16:1-16:0 |                 |                 |                 | 0.28 $\pm$ 0.06 | 0.29 $\pm$ 0.10 | 0.33 $\pm$ 0.04 |
|                     | 0-18:2-18:2-18:1-16:1 |                 |                 |                 |                 |                 |                 |
| 721.0               | 0-18:2-18:1-18:1-16:1 |                 |                 |                 | 0.42 $\pm$ 0.16 | 0.37 $\pm$ 0.03 | 0.52 $\pm$ 0.08 |
|                     | 0-18:1-18:1-18:1-16:2 |                 |                 |                 |                 |                 |                 |
|                     | 0-18:2-18:1-18:0-16:2 |                 |                 |                 |                 |                 |                 |
|                     | 0-18:2-18:2-18:0-16:1 |                 |                 |                 |                 |                 |                 |
| 722.0               | 20:4-20:4-16:1-16:1   | 0.23 $\pm$ 0.03 |                 | 0.27 $\pm$ 0.08 | 0.24 $\pm$ 0.10 | 0.23 $\pm$ 0.09 | 0.31 $\pm$ 0.05 |
| 723.0               | 20:4-20:4-16:1-16:0   | 0.36 $\pm$ 0.03 |                 | 0.18 $\pm$ 0.05 | 0.37 $\pm$ 0.08 | 0.21 $\pm$ 0.03 | 0.26 $\pm$ 0.05 |
|                     | 20:4-18:2-18:2-16:1   |                 |                 |                 |                 |                 |                 |
| 724.0               | 20:4-18:2-18:1-16:1   | 0.95 $\pm$ 0.08 | 1.36 $\pm$ 0.21 | 0.65 $\pm$ 0.14 | 0.47 $\pm$ 0.12 | 0.36 $\pm$ 0.10 | 0.60 $\pm$ 0.05 |
| 725.0               | 20:4-18:2-18:1-16:0   | 2.22 $\pm$ 0.17 | 1.61 $\pm$ 0.31 | 1.07 $\pm$ 0.19 | 0.59 $\pm$ 0.08 | 0.70 $\pm$ 0.27 | 1.11 $\pm$ 0.16 |
|                     | 20:4-18:1-18:1-16:1   |                 |                 |                 |                 |                 |                 |
| 726.0               | 20:4-18:1-18:1-16:0   | 1.74 $\pm$ 0.13 | 2.09 $\pm$ 0.04 | 1.42 $\pm$ 0.31 | 0.72 $\pm$ 0.25 | 1.28 $\pm$ 0.48 | 1.87 $\pm$ 0.23 |
|                     | 20:3-18:1-18:1-16:1   |                 |                 |                 |                 |                 |                 |
| 727.0               | 18:2-18:1-18:1-18:1   | 2.48 $\pm$ 0.33 |                 | 0.77 $\pm$ 0.15 | 0.83 $\pm$ 0.27 | 1.39 $\pm$ 0.25 | 2.28 $\pm$ 0.50 |
| 728.0               | 18:1-18:1-18:1-18:1   | 3.72 $\pm$ 0.72 |                 | 0.32 $\pm$ 0.05 | 0.48 $\pm$ 0.15 | 0.72 $\pm$ 0.16 | 1.32 $\pm$ 0.49 |
| 729.0               | 18:1-18:1-18:1-18:0   | 0.30 $\pm$ 0.03 |                 | 0.11 $\pm$ 0.03 | 0.24 $\pm$ 0.06 | 0.23 $\pm$ 0.03 | 0.28 $\pm$ 0.01 |
| 731.0               | 0-20:4-20:4-16:1-16:0 |                 |                 |                 | 0.24 $\pm$ 0.05 | 0.22 $\pm$ 0.02 | 0.30 $\pm$ 0.03 |
|                     | 0-20:4-18:2-18:2-16:1 |                 |                 |                 |                 |                 |                 |
| 732.0               | 0-20:4-18:2-18:1-16:1 |                 |                 |                 | 0.12 $\pm$ 0.00 | 0.12 $\pm$ 0.01 | 0.18 $\pm$ 0.02 |
| 734.0               | 22:6-20:4-16:1-16:1   | 0.14 $\pm$ 0.02 |                 | 0.04 $\pm$ 0.01 | 0.10 $\pm$ 0.02 | 0.15 $\pm$ 0.06 | 0.14 $\pm$ 0.01 |
| 735.0               | 20:4-20:4-18:2-16:1   | 0.56 $\pm$ 0.06 |                 | 0.07 $\pm$ 0.02 | 0.16 $\pm$ 0.05 | 0.15 $\pm$ 0.00 | 0.27 $\pm$ 0.04 |
| 736.0               | 20:4-20:4-18:1-16:1   | 1.41 $\pm$ 0.16 |                 | 0.20 $\pm$ 0.05 | 0.18 $\pm$ 0.03 | 0.18 $\pm$ 0.04 | 0.28 $\pm$ 0.02 |
| 737.0               | 20:4-20:4-18:1-16:0   | 2.11 $\pm$ 0.07 | 1.00 $\pm$ 0.07 | 0.41 $\pm$ 0.14 | 0.32 $\pm$ 0.06 | 0.33 $\pm$ 0.06 | 0.78 $\pm$ 0.14 |
|                     | 22:6-18:1-18:1-16:1   |                 |                 |                 |                 |                 |                 |
|                     | 22:6-18:2-18:1-16:0   |                 |                 |                 |                 |                 |                 |
| 738.0               | 20:4-18:2-18:1-18:1   | 2.68 $\pm$ 0.37 | 1.20 $\pm$ 0.28 | 0.46 $\pm$ 0.10 | 0.34 $\pm$ 0.04 | 0.40 $\pm$ 0.12 | 0.93 $\pm$ 0.18 |
|                     | 22:6-18:1-18:1-16:0   |                 |                 |                 |                 |                 |                 |
| 739.0               | 20:4-18:1-18:1-18:1   | 3.30 $\pm$ 0.45 |                 | 0.39 $\pm$ 0.11 | 0.24 $\pm$ 0.04 | 0.44 $\pm$ 0.15 | 0.80 $\pm$ 0.21 |
| 740.0               | 20:4-18:1-18:1-18:0   | 1.07 $\pm$ 0.14 |                 | 0.19 $\pm$ 0.04 | 0.21 $\pm$ 0.05 | 0.36 $\pm$ 0.04 | 0.53 $\pm$ 0.15 |
|                     | 20:3-18:1-18:1-18:1   |                 |                 |                 |                 |                 |                 |
| 741.0               | 20:4-18:1-18:0-18:0   | 0.25 $\pm$ 0.08 |                 | 0.10 $\pm$ 0.02 | 0.09 $\pm$ 0.02 | 0.14 $\pm$ 0.02 | 0.20 $\pm$ 0.08 |
|                     | 20:3-18:1-18:1-18:0   |                 |                 |                 |                 |                 |                 |
| 747.0               | 22:6-18:3-18:2-18:2   | 0.40 $\pm$ 0.04 |                 |                 | 0.15 $\pm$ 0.04 | 0.12 $\pm$ 0.01 | 0.12 $\pm$ 0.04 |
| 748.0               | 20:4-20:4-18:2-18:2   | 1.38 $\pm$ 0.09 |                 | 0.25 $\pm$ 0.04 | 0.43 $\pm$ 0.13 | 0.31 $\pm$ 0.03 | 0.29 $\pm$ 0.09 |
|                     | 20:4-20:4-20:4-16:0   |                 |                 |                 |                 |                 |                 |
|                     | 22:6-20:4-18:1-16:1   |                 |                 |                 |                 |                 |                 |
|                     | 22:6-22:6-16:0-16:0   |                 |                 |                 |                 |                 |                 |
|                     | 22:6-18:2-18:2-18:2   |                 |                 |                 |                 |                 |                 |
| 749.0               | 20:4-20:4-18:2-18:1   | 1.99 $\pm$ 0.19 |                 | 0.19 $\pm$ 0.03 | 0.15 $\pm$ 0.10 | 0.11 $\pm$ 0.02 | 0.22 $\pm$ 0.08 |
| 750.0               | 20:4-20:4-18:1-18:1   | 3.24 $\pm$ 0.24 |                 | 0.26 $\pm$ 0.04 | 0.25 $\pm$ 0.05 | 0.28 $\pm$ 0.04 | 0.47 $\pm$ 0.09 |
| 751.0               | 22:6-18:1-18:1-18:1   | 2.74 $\pm$ 0.10 |                 | 0.17 $\pm$ 0.02 | 0.15 $\pm$ 0.04 | 0.21 $\pm$ 0.02 | 0.40 $\pm$ 0.13 |
|                     | 20:4-20:3-18:1-18:1   |                 |                 |                 |                 |                 |                 |
| 752.0               | 22:6-18:1-18:1-18:0   | 0.54 $\pm$ 0.17 |                 | 0.12 $\pm$ 0.04 |                 |                 | 0.24 $\pm$ 0.05 |

Table S3 Continued

| [M-2H] <sup>-</sup> | Molecular species                                                                        | <i>In vivo</i> |             |             | <i>In vitro</i> |             |             |
|---------------------|------------------------------------------------------------------------------------------|----------------|-------------|-------------|-----------------|-------------|-------------|
|                     |                                                                                          | Brain          | CT-2A       | EPEN        | Astrocyte       | CT-2A       | EPEN        |
| 753.0               | 20:4-20:2-18:1-18:0<br>20:4-20:1-18:1-18:1                                               | 0.15 ± 0.04    |             | 0.07 ± 0.01 |                 |             | 0.21 ± 0.04 |
| 754.0               | 20:4-20:1-18:1-18:0                                                                      | 0.09 ± 0.02    |             | 0.05 ± 0.02 |                 |             | 0.12 ± 0.01 |
| 755.0               | 20:4-20:1-18:0-18:0                                                                      |                |             | 0.04 ± 0.01 |                 |             | 0.14 ± 0.02 |
| 759.0               | 22:6-20:4-20:4-16:1<br>22:6-22:6-18:2-16:1                                               | 0.32 ± 0.04    |             | 0.05 ± 0.02 | 0.17 ± 0.05     | 0.17 ± 0.05 | 0.20 ± 0.02 |
| 760.0               | 22:6-20:4-18:2-18:2<br>22:6-20:4-20:4-16:0<br>22:6-22:6-18:1-16:1                        | 0.76 ± 0.05    |             | 0.07 ± 0.03 |                 |             | 0.10 ± 0.03 |
| 761.0               | 22:6-20:4-18:2-18:1                                                                      | 1.72 ± 0.08    |             | 0.18 ± 0.08 | 0.20 ± 0.09     | 0.17 ± 0.03 | 0.23 ± 0.04 |
| 762.0               | 22:6-20:4-18:1-18:1                                                                      | 2.94 ± 0.23    |             | 0.11 ± 0.02 |                 |             | 0.20 ± 0.03 |
| 763.0               | 22:6-20:4-18:1-18:0<br>22:6-20:3-18:1-18:1                                               | 1.03 ± 0.05    |             | 0.07 ± 0.02 |                 |             | 0.18 ± 0.02 |
| 764.0               | 22:4-20:4-18:1-18:1<br>22:6-20:3-18:1-18:0                                               | 0.24 ± 0.02    |             | 0.11 ± 0.03 |                 |             | 0.21 ± 0.14 |
| 765.0               | 22:4-20:4-18:1-18:0                                                                      |                |             | 0.08 ± 0.01 |                 |             | 0.27 ± 0.06 |
| 771.0               | 22:6-20:4-20:4-18:3                                                                      | 0.18 ± 0.05    |             | 0.09 ± 0.02 | 0.11 ± 0.07     | 0.07 ± 0.01 | 0.11 ± 0.00 |
| 772.0               | 22:6-22:6-20:4-16:0<br>20:4-20:4-20:4-20:4<br>22:6-20:4-20:4-18:2<br>22:6-22:6-18:2-18:2 | 0.42 ± 0.05    |             | 0.10 ± 0.04 | 0.12 ± 0.05     | 0.09 ± 0.02 | 0.13 ± 0.01 |
| 773.0               | 22:6-20:4-20:4-18:1                                                                      | 1.42 ± 0.12    | 2.03 ± 0.11 | 0.14 ± 0.04 | 0.13 ± 0.05     | 0.11 ± 0.04 | 0.11 ± 0.04 |
| 774.0               | 22:6-22:6-18:1-18:1<br>22:6-20:4-20:3-18:1                                               | 1.81 ± 0.09    | 1.64 ± 0.18 | 0.11 ± 0.02 | 0.35 ± 0.22     | 0.20 ± 0.06 | 0.21 ± 0.05 |
| 775.0               | 16:0-20:3-22:5-22:5<br>18:2-20:3-20:3-22:5<br>18:0-18:1-22:6-22:6<br>18:0-20:3-20:4-22:6 | 0.28 ± 0.10    |             |             |                 |             |             |
| 776.0               | 18:0-18:0-22:6-22:6                                                                      | 0.16 ± 0.05    |             |             |                 |             |             |
| 783.0               | 0-22:6-22:6-18:0-18:1<br>0-22:6-20:3-20:4-18:0                                           |                |             |             | 0.30 ± 0.31     | 0.21 ± 0.05 | 0.12 ± 0.02 |
| 784.0               | 22:6-22:6-20:4-18:2                                                                      | 0.33 ± 0.05    |             |             |                 |             |             |
| 786.0               | 22:6-22:6-20:4-18:1<br>22:6-20:4-20:4-20:3                                               | 1.34 ± 0.09    |             |             |                 |             |             |
| 796.0               | 20:4-20:4-22:6-22:6                                                                      | 0.25 ± 0.09    |             | 0.14 ± 0.06 | 0.42 ± 0.42     | 0.14 ± 0.02 | 0.33 ± 0.07 |
| 797.0               | 22:6-22:6-22:6-18:1<br>22:6-22:6-20:4-20:3                                               | 0.50 ± 0.04    |             | 0.12 ± 0.05 | 0.30 ± 0.30     | 0.14 ± 0.02 | 0.22 ± 0.00 |
| 798.0               | 20:4-20:3-22:6-22:5<br>22:6-22:6-22:6-18:0<br>22:6-22:6-22:5-18:1                        | 0.16 ± 0.07    |             | 0.06 ± 0.02 | 0.26 ± 0.21     | 0.11 ± 0.02 | 0.22 ± 0.04 |
| 808.0               | 20:4-22:6-22:6-22:6                                                                      |                |             | 0.07 ± 0.03 | 0.28 ± 0.22     | 0.22 ± 0.06 | 0.22 ± 0.04 |
| 809.0               | 20:4-22:6-22:6-22:5                                                                      |                |             |             | 0.30 ± 0.22     | 0.27 ± 0.09 | 0.32 ± 0.06 |
| 813.0               | 22:6-22:6-22:6-22:5                                                                      |                |             | 0.06 ± 0.02 | 0.17 ± 0.03     | 0.18 ± 0.01 | 0.20 ± 0.03 |

**Table S4** Mass content of phosphatidylinositol molecular species of mitochondria isolated from brain, brain tumour and cells  
Values are expressed as mean nmol/mg of protein  $\pm$  S.D. ( $n=3$ ).

| [M-H] <sup>-</sup> | Molecular species | <i>In vivo</i>  |                 |                 | <i>In vitro</i> |                 |                  |
|--------------------|-------------------|-----------------|-----------------|-----------------|-----------------|-----------------|------------------|
|                    |                   | Brain           | CT-2A           | EPEN            | Astrocyte       | CT-2A           | EPEN             |
| 807.5              | 16:0-16:1         |                 | 0.04 $\pm$ 0.02 | 0.07 $\pm$ 0.04 | 0.06 $\pm$ 0.02 | 0.11 $\pm$ 0.03 | 0.08 $\pm$ 0.02  |
| 809.5              | 16:0-16:0         | 0.07 $\pm$ 0.02 | 0.03 $\pm$ 0.01 | 0.07 $\pm$ 0.05 | 0.02 $\pm$ 0.01 | 0.03 $\pm$ 0.01 | 0.07 $\pm$ 0.02  |
| 821.6              | A16:0-18:1        |                 | 0.04 $\pm$ 0.02 | 0.06 $\pm$ 0.05 | 0.04 $\pm$ 0.02 | 0.08 $\pm$ 0.03 | 0.04 $\pm$ 0.02  |
| 831.5              | 16:1-18:2         |                 | 0.07 $\pm$ 0.06 | 0.18 $\pm$ 0.14 | 0.09 $\pm$ 0.03 | 0.04 $\pm$ 0.02 | 0.06 $\pm$ 0.02  |
|                    | 16:0-18:3         |                 |                 |                 |                 |                 |                  |
| 833.5              | 16:0-18:2         | 0.02 $\pm$ 0.01 | 0.09 $\pm$ 0.04 | 0.25 $\pm$ 0.08 | 0.26 $\pm$ 0.10 | 0.31 $\pm$ 0.04 | 0.20 $\pm$ 0.04  |
| 835.5              | 16:0-18:1         | 0.18 $\pm$ 0.08 | 0.11 $\pm$ 0.03 | 0.15 $\pm$ 0.09 | 0.29 $\pm$ 0.15 | 0.96 $\pm$ 0.20 | 0.60 $\pm$ 0.04  |
| 837.5              | 16:0-18:0         | 0.05 $\pm$ 0.02 | 0.03 $\pm$ 0.02 | 0.06 $\pm$ 0.03 | 0.02 $\pm$ 0.01 | 0.08 $\pm$ 0.01 | 0.12 $\pm$ 0.04  |
| 843.5              | P18:1-18:2        |                 | 0.05 $\pm$ 0.03 | 0.10 $\pm$ 0.10 | 0.15 $\pm$ 0.06 | 0.05 $\pm$ 0.01 | 0.04 $\pm$ 0.01  |
| 845.6              | P18:1-18:1        |                 | 0.05 $\pm$ 0.02 | 0.10 $\pm$ 0.10 | 0.12 $\pm$ 0.07 | 0.08 $\pm$ 0.02 | 0.04 $\pm$ 0.02  |
| 847.6              | P18:0-18:1        |                 | 0.06 $\pm$ 0.03 | 0.09 $\pm$ 0.04 | 0.11 $\pm$ 0.04 | 0.31 $\pm$ 0.07 | 0.06 $\pm$ 0.01  |
| 849.6              | A18:0-18:1        |                 | 0.07 $\pm$ 0.03 | 0.11 $\pm$ 0.06 | 0.08 $\pm$ 0.06 | 0.19 $\pm$ 0.06 | 0.09 $\pm$ 0.02  |
| 857.5              | 16:0-20:4         | 1.12 $\pm$ 0.09 | 0.21 $\pm$ 0.04 | 0.64 $\pm$ 0.16 | 1.23 $\pm$ 0.18 | 0.36 $\pm$ 0.07 | 1.04 $\pm$ 0.19  |
| 859.5              | 18:1-18:2         | 0.03 $\pm$ 0.02 | 0.21 $\pm$ 0.04 | 0.42 $\pm$ 0.25 | 0.87 $\pm$ 0.08 | 0.84 $\pm$ 0.25 | 0.29 $\pm$ 0.06  |
| 861.5              | 18:0-18:2         | 0.03 $\pm$ 0.01 | 0.36 $\pm$ 0.06 | 0.56 $\pm$ 0.22 | 0.91 $\pm$ 0.27 | 3.16 $\pm$ 0.53 | 0.85 $\pm$ 0.13  |
| 863.6              | 18:0-18:1         | 0.06 $\pm$ 0.03 | 0.14 $\pm$ 0.06 | 0.19 $\pm$ 0.17 | 0.25 $\pm$ 0.14 | 1.62 $\pm$ 0.49 | 0.88 $\pm$ 0.13  |
| 865.6              | 18:0-18:0         | 0.03 $\pm$ 0.01 | 0.11 $\pm$ 0.04 | 0.15 $\pm$ 0.18 | 0.02 $\pm$ 0.01 | 0.10 $\pm$ 0.06 | 0.13 $\pm$ 0.06  |
| 869.6              | P18:0-20:4        |                 | 0.12 $\pm$ 0.04 | 0.20 $\pm$ 0.13 | 0.46 $\pm$ 0.01 | 0.16 $\pm$ 0.02 | 0.12 $\pm$ 0.06  |
| 873.6              | A18:0-20:3        |                 | 0.05 $\pm$ 0.01 | 0.24 $\pm$ 0.19 | 0.37 $\pm$ 0.08 | 0.29 $\pm$ 0.03 | 0.09 $\pm$ 0.02  |
|                    | P18:0-20:2        |                 |                 |                 |                 |                 |                  |
| 875.6              | A18:0-20:2        |                 | 0.05 $\pm$ 0.01 | 0.07 $\pm$ 0.04 | 0.07 $\pm$ 0.04 | 0.24 $\pm$ 0.02 | 0.03 $\pm$ 0.02  |
|                    | P18:0-20:1        |                 |                 |                 |                 |                 |                  |
| 877.6              | A18:0-20:1        |                 | 0.05 $\pm$ 0.01 | 0.06 $\pm$ 0.06 | 0.02 $\pm$ 0.00 | 0.06 $\pm$ 0.04 | 0.02 $\pm$ 0.01  |
|                    | P18:0-20:0        |                 |                 |                 |                 |                 |                  |
| 881.5              | 18:2-20:4         | 0.23 $\pm$ 0.01 | 0.05 $\pm$ 0.01 | 0.21 $\pm$ 0.08 | 0.13 $\pm$ 0.02 | 0.08 $\pm$ 0.02 | 0.12 $\pm$ 0.01  |
|                    | 16:0-22:6         |                 |                 |                 |                 |                 |                  |
| 883.5              | 18:1-20:4         |                 | 0.26 $\pm$ 0.11 | 0.40 $\pm$ 0.22 | 1.79 $\pm$ 0.24 | 0.95 $\pm$ 0.28 | 1.52 $\pm$ 0.22  |
| 885.5              | 18:0-20:4         | 6.68 $\pm$ 0.41 | 3.08 $\pm$ 0.55 | 8.77 $\pm$ 1.90 | 7.80 $\pm$ 1.21 | 3.82 $\pm$ 0.81 | 11.74 $\pm$ 2.52 |
| 887.6              | 18:0-20:3         | 0.17 $\pm$ 0.15 | 0.69 $\pm$ 0.18 | 2.41 $\pm$ 0.50 | 1.94 $\pm$ 0.45 | 2.92 $\pm$ 0.27 | 1.09 $\pm$ 0.15  |
| 889.6              | 18:0-20:2         | 0.03 $\pm$ 0.01 | 0.16 $\pm$ 0.03 | 0.39 $\pm$ 0.14 | 0.17 $\pm$ 0.07 | 0.93 $\pm$ 0.11 | 0.15 $\pm$ 0.03  |
| 893.6              | 18:0-20:0         | 0.09 $\pm$ 0.02 | 0.15 $\pm$ 0.06 | 0.17 $\pm$ 0.10 | 0.05 $\pm$ 0.02 | 0.09 $\pm$ 0.05 | 0.11 $\pm$ 0.01  |
| 897.6              | A18:0-22:5        |                 | 0.17 $\pm$ 0.18 | 0.19 $\pm$ 0.10 | 0.08 $\pm$ 0.02 | 0.03 $\pm$ 0.02 | 0.05 $\pm$ 0.03  |
|                    | P18:0-22:4        |                 |                 |                 |                 |                 |                  |
| 899.6              | A18:0-22:4        |                 | 0.24 $\pm$ 0.10 | 0.47 $\pm$ 0.07 | 0.10 $\pm$ 0.02 | 0.04 $\pm$ 0.03 | 0.04 $\pm$ 0.03  |
| 901.6              | A18:0-22:3        |                 | 0.13 $\pm$ 0.06 | 0.24 $\pm$ 0.12 | 0.12 $\pm$ 0.00 | 0.06 $\pm$ 0.05 | 0.04 $\pm$ 0.01  |
| 905.5              | 18:2-22:6         |                 | 0.14 $\pm$ 0.06 | 0.25 $\pm$ 0.21 | 0.04 $\pm$ 0.02 | 0.02 $\pm$ 0.02 | 0.03 $\pm$ 0.01  |
| 907.5              | 18:1-22:6         | 0.05 $\pm$ 0.03 | 0.09 $\pm$ 0.01 | 0.06 $\pm$ 0.08 | 0.05 $\pm$ 0.01 | 0.01 $\pm$ 0.01 | 0.04 $\pm$ 0.03  |
| 909.5              | 18:0-22:6         | 0.37 $\pm$ 0.02 | 0.09 $\pm$ 0.04 | 0.28 $\pm$ 0.16 | 0.09 $\pm$ 0.04 | 0.08 $\pm$ 0.10 | 0.16 $\pm$ 0.08  |
| 911.6              | 18:0-22:5         |                 | 0.12 $\pm$ 0.05 | 0.37 $\pm$ 0.25 | 0.18 $\pm$ 0.04 | 0.11 $\pm$ 0.09 | 0.27 $\pm$ 0.16  |
| 913.6              | 18:0-22:4         |                 | 0.19 $\pm$ 0.09 | 0.56 $\pm$ 0.20 | 0.17 $\pm$ 0.04 | 0.11 $\pm$ 0.10 | 0.16 $\pm$ 0.08  |
| 915.6              | 18:0-22:3         |                 | 0.15 $\pm$ 0.05 | 0.22 $\pm$ 0.07 | 0.02 $\pm$ 0.01 | 0.03 $\pm$ 0.03 | 0.03 $\pm$ 0.02  |
| 937.6              | 20:0-22:6         |                 | 0.08 $\pm$ 0.06 | 0.13 $\pm$ 0.04 | 0.01 $\pm$ 0.01 |                 |                  |
| 937.5              | P22:6-22:6        |                 | 0.09 $\pm$ 0.07 | 0.14 $\pm$ 0.05 | 0.01 $\pm$ 0.01 |                 |                  |
| 953.5              | 22:6-22:6         | 0.08 $\pm$ 0.03 | 1.43 $\pm$ 1.05 | 0.22 $\pm$ 0.11 | 0.20 $\pm$ 0.17 | 0.03 $\pm$ 0.05 |                  |

**Table S5** Mass content of phosphatidylglycerol molecular species of mitochondria isolated from brain, brain tumour and cells  
Values are expressed as mean nmol/mg of protein  $\pm$  S.D. ( $n=3$ ).

| [M-H] <sup>-</sup> | Molecular species | <i>In vivo</i>  |                 |                 | <i>In vitro</i> |                 |                 |
|--------------------|-------------------|-----------------|-----------------|-----------------|-----------------|-----------------|-----------------|
|                    |                   | Brain           | CT-2A           | EPEN            | Astrocyte       | CT-2A           | EPEN            |
| 707.5              | A16:0-16:0        |                 |                 |                 | 0.88 $\pm$ 0.31 | 2.41 $\pm$ 2.04 | 0.36 $\pm$ 0.04 |
| 719.5              | 16:0-16:1         | 0.29 $\pm$ 0.02 | 0.89 $\pm$ 0.01 | 1.47 $\pm$ 0.43 | 0.41 $\pm$ 0.07 | 0.40 $\pm$ 0.01 | 0.30 $\pm$ 0.03 |
| 721.5              | 16:0-16:0         | 0.49 $\pm$ 0.04 | 0.34 $\pm$ 0.09 | 1.13 $\pm$ 0.35 | 0.27 $\pm$ 0.04 | 0.50 $\pm$ 0.45 | 0.86 $\pm$ 0.14 |
| 743.5              | 16:1-18:2         | 0.22 $\pm$ 0.04 | 0.89 $\pm$ 0.42 | 1.30 $\pm$ 0.38 | 0.27 $\pm$ 0.09 | 0.14 $\pm$ 0.02 | 0.14 $\pm$ 0.03 |
| 745.5              | 16:0-18:2         | 0.54 $\pm$ 0.10 | 1.07 $\pm$ 0.03 | 3.99 $\pm$ 0.71 | 0.95 $\pm$ 0.34 | 0.52 $\pm$ 0.17 | 0.44 $\pm$ 0.01 |
| 747.5              | 16:0-18:1         | 3.41 $\pm$ 0.13 | 3.35 $\pm$ 0.15 | 2.30 $\pm$ 0.26 | 2.23 $\pm$ 0.69 | 1.82 $\pm$ 0.23 | 1.21 $\pm$ 0.15 |
| 769.5              | 18:2-18:2         | 0.82 $\pm$ 0.04 | 0.38 $\pm$ 0.02 | 1.15 $\pm$ 0.36 | 0.37 $\pm$ 0.16 | 0.16 $\pm$ 0.02 | 0.27 $\pm$ 0.04 |
| 771.5              | 18:1-18:2         | 0.29 $\pm$ 0.03 | 0.65 $\pm$ 0.07 | 1.29 $\pm$ 0.20 | 0.45 $\pm$ 0.18 | 0.23 $\pm$ 0.06 | 0.27 $\pm$ 0.03 |
| 773.5              | 18:1-18:1         | 0.47 $\pm$ 0.12 | 1.49 $\pm$ 0.04 | 2.24 $\pm$ 0.49 | 1.41 $\pm$ 0.85 | 0.88 $\pm$ 0.39 | 0.54 $\pm$ 0.10 |
| 775.5              | 18:0-18:1         | 0.55 $\pm$ 0.10 | 0.77 $\pm$ 0.03 | 1.47 $\pm$ 0.48 | 0.44 $\pm$ 0.15 | 0.47 $\pm$ 0.12 | 0.33 $\pm$ 0.05 |



**Table S6** Mass content of sphingomyelin molecular species of mitochondria isolated from brain, brain tumour and cells  
Values are expressed as mean nmol/mg of protein  $\pm$  S.D. ( $n=3$ ).

| [M+Li] <sup>+</sup> | Molecular species | <i>In vivo</i>  |                 |                 | <i>In vitro</i> |                 |                  |
|---------------------|-------------------|-----------------|-----------------|-----------------|-----------------|-----------------|------------------|
|                     |                   | Brain           | CT-2A           | EPEN            | Astrocyte       | CT-2A           | EPEN             |
| 691.5               | N15:2             |                 |                 |                 | 0.01 $\pm$ 0.00 | 0.01 $\pm$ 0.00 | 0.01 $\pm$ 0.01  |
| 693.6               | N15:1             |                 |                 |                 | 0.01 $\pm$ 0.00 | 0.01 $\pm$ 0.00 | 0.02 $\pm$ 0.00  |
| 695.6               | N15:0             |                 |                 |                 | 0.25 $\pm$ 0.03 | 0.34 $\pm$ 0.12 | 0.32 $\pm$ 0.04  |
| 707.6               | N16:1             |                 | 0.22 $\pm$ 0.01 | 0.94 $\pm$ 0.55 | 0.47 $\pm$ 0.01 | 0.58 $\pm$ 0.19 | 1.27 $\pm$ 0.04  |
| 709.6               | N16:0             | 0.27 $\pm$ 0.32 | 1.53 $\pm$ 0.04 | 2.41 $\pm$ 0.73 | 4.22 $\pm$ 0.74 | 8.32 $\pm$ 2.46 | 11.72 $\pm$ 0.53 |
| 721.6               | N17:1             |                 |                 |                 | 0.04 $\pm$ 0.00 | 0.02 $\pm$ 0.01 | 0.03 $\pm$ 0.01  |
| 723.6               | N17:0             |                 |                 |                 | 0.19 $\pm$ 0.00 | 0.21 $\pm$ 0.05 | 0.26 $\pm$ 0.01  |
| 733.6               | N18:2             |                 |                 |                 | 0.04 $\pm$ 0.01 | 0.01 $\pm$ 0.00 | 0.02 $\pm$ 0.01  |
| 735.6               | N18:1             | 0.26 $\pm$ 0.02 | 0.09 $\pm$ 0.04 | 0.34 $\pm$ 0.19 | 0.32 $\pm$ 0.03 | 0.14 $\pm$ 0.01 | 0.85 $\pm$ 0.11  |
| 737.6               | N18:0             | 1.99 $\pm$ 0.38 | 0.52 $\pm$ 0.08 | 0.47 $\pm$ 0.12 | 1.07 $\pm$ 0.15 | 1.00 $\pm$ 0.11 | 2.13 $\pm$ 0.14  |
| 749.6               | N19:1             |                 |                 |                 | 0.04 $\pm$ 0.01 | 0.01 $\pm$ 0.01 | 0.02 $\pm$ 0.01  |
| 751.6               | N19:0             |                 |                 |                 | 0.08 $\pm$ 0.01 | 0.09 $\pm$ 0.05 | 0.13 $\pm$ 0.02  |
| 761.6               | N20:2             | 0.03 $\pm$ 0.04 |                 | 0.04 $\pm$ 0.04 | 0.05 $\pm$ 0.02 | 0.01 $\pm$ 0.01 | 0.01 $\pm$ 0.01  |
| 763.6               | N20:1             | 0.07 $\pm$ 0.00 | 0.41 $\pm$ 0.10 | 0.52 $\pm$ 0.34 | 0.34 $\pm$ 0.05 | 0.26 $\pm$ 0.03 | 0.24 $\pm$ 0.03  |
| 765.6               | N20:0             | 2.33 $\pm$ 0.41 | 0.34 $\pm$ 0.02 | 0.50 $\pm$ 0.07 | 0.66 $\pm$ 0.09 | 0.83 $\pm$ 0.08 | 1.23 $\pm$ 0.05  |
| 775.6               | N21:2             |                 |                 |                 |                 |                 | 0.01 $\pm$ 0.01  |
| 777.6               | N21:1             |                 |                 |                 | 0.03 $\pm$ 0.02 | 0.05 $\pm$ 0.01 | 0.04 $\pm$ 0.03  |
| 779.7               | N21:0             |                 |                 |                 | 0.04 $\pm$ 0.01 | 0.06 $\pm$ 0.03 | 0.09 $\pm$ 0.01  |
| 789.6               | N22:2             |                 | 0.15 $\pm$ 0.18 | 0.31 $\pm$ 0.39 |                 | 0.03 $\pm$ 0.04 |                  |
| 791.7               | N22:1             |                 | 0.55 $\pm$ 0.09 | 0.01 $\pm$ 0.01 | 0.35 $\pm$ 0.15 | 0.60 $\pm$ 0.15 | 0.39 $\pm$ 0.04  |
| 793.7               | N22:0             | 0.16 $\pm$ 0.27 |                 |                 | 0.26 $\pm$ 0.13 | 0.56 $\pm$ 0.12 | 0.73 $\pm$ 0.11  |
| 805.7               | N23:1             |                 |                 |                 | 0.08 $\pm$ 0.01 | 0.10 $\pm$ 0.03 | 0.10 $\pm$ 0.04  |
| 807.7               | N23:0             |                 |                 |                 | 0.02 $\pm$ 0.02 | 0.08 $\pm$ 0.01 | 0.11 $\pm$ 0.01  |
| 817.7               | N24:2             |                 | 0.14 $\pm$ 0.04 |                 | 0.12 $\pm$ 0.03 | 0.36 $\pm$ 0.15 | 0.05 $\pm$ 0.09  |
| 819.7               | N24:1             |                 | 0.65 $\pm$ 0.08 | 0.24 $\pm$ 0.21 | 0.62 $\pm$ 0.20 | 1.73 $\pm$ 0.54 | 1.34 $\pm$ 0.21  |
| 821.7               | N24:0             | 0.20 $\pm$ 0.14 |                 | 0.06 $\pm$ 0.08 | 0.13 $\pm$ 0.05 | 0.24 $\pm$ 0.04 | 0.57 $\pm$ 0.22  |
| 833.7               | N25:1             |                 |                 |                 | 0.11 $\pm$ 0.05 | 0.07 $\pm$ 0.02 | 0.25 $\pm$ 0.05  |
| 835.7               | N25:0             |                 |                 |                 | 0.13 $\pm$ 0.02 | 0.22 $\pm$ 0.12 | 0.21 $\pm$ 0.04  |

**Table S7** Mass content of phosphatidylserine molecular species of mitochondria isolated from brain, brain tumour and cells  
Values are expressed as mean nmol/mg of protein  $\pm$  S.D. ( $n=3$ ).

| [M-H] <sup>-</sup> | Molecular species | <i>In vivo</i>  |                 |                 | <i>In vitro</i> |                  |                  |
|--------------------|-------------------|-----------------|-----------------|-----------------|-----------------|------------------|------------------|
|                    |                   | Brain           | CT-2A           | EPEN            | Astrocyte       | CT-2A            | EPEN             |
| 706.5              | 14:0-16:0         | 0.01 $\pm$ 0.01 |                 |                 |                 |                  |                  |
| 732.5              | 16:0-16:1         |                 | 0.02 $\pm$ 0.00 | 0.01 $\pm$ 0.00 | 0.12 $\pm$ 0.03 | 0.62 $\pm$ 0.33  | 0.01 $\pm$ 0.01  |
| 734.5              | 16:0-16:0         |                 | 0.03 $\pm$ 0.02 | 0.01 $\pm$ 0.00 | 0.02 $\pm$ 0.01 | 0.03 $\pm$ 0.02  | 0.02 $\pm$ 0.01  |
| 744.5              | P16:0-18:1        |                 | 0.02 $\pm$ 0.01 | 0.01 $\pm$ 0.01 | 0.02 $\pm$ 0.00 | 0.03 $\pm$ 0.01  | 0.02 $\pm$ 0.01  |
| 746.5              | P16:0-18:0        |                 | 0.03 $\pm$ 0.01 | 0.03 $\pm$ 0.01 | 0.10 $\pm$ 0.04 | 0.21 $\pm$ 0.07  | 0.03 $\pm$ 0.02  |
| 758.5              | 16:0-18:2         |                 | 0.08 $\pm$ 0.01 | 0.03 $\pm$ 0.02 | 0.16 $\pm$ 0.05 | 0.31 $\pm$ 0.11  | 0.05 $\pm$ 0.02  |
| 760.5              | 16:0-18:1         | 0.07 $\pm$ 0.02 | 0.55 $\pm$ 0.08 | 0.20 $\pm$ 0.05 | 2.35 $\pm$ 0.37 | 4.78 $\pm$ 1.46  | 0.37 $\pm$ 0.15  |
| 762.5              | 16:0-18:0         |                 | 0.05 $\pm$ 0.04 | 0.02 $\pm$ 0.00 | 0.03 $\pm$ 0.01 | 0.05 $\pm$ 0.04  | 0.10 $\pm$ 0.07  |
| 772.5              | P18:0-18:1        |                 | 0.03 $\pm$ 0.01 | 0.05 $\pm$ 0.01 | 0.05 $\pm$ 0.02 | 0.10 $\pm$ 0.05  | 0.03 $\pm$ 0.01  |
| 774.6              | P18:0-18:0        |                 | 0.09 $\pm$ 0.01 | 0.04 $\pm$ 0.01 | 0.36 $\pm$ 0.09 | 0.68 $\pm$ 0.17  | 0.12 $\pm$ 0.04  |
| 782.5              | 18:2-18:2         |                 | 0.03 $\pm$ 0.02 | 0.04 $\pm$ 0.02 | 0.05 $\pm$ 0.02 | 0.06 $\pm$ 0.01  | 0.01 $\pm$ 0.01  |
| 784.5              | 18:1-18:2         | 0.02 $\pm$ 0.01 | 0.05 $\pm$ 0.02 | 0.03 $\pm$ 0.00 | 0.08 $\pm$ 0.02 | 0.21 $\pm$ 0.01  | 0.05 $\pm$ 0.02  |
| 786.5              | 18:0-18:2         | 0.29 $\pm$ 0.07 | 0.93 $\pm$ 0.02 | 0.74 $\pm$ 0.23 | 1.01 $\pm$ 0.09 | 2.66 $\pm$ 0.88  | 0.64 $\pm$ 0.23  |
| 788.5              | 18:0-18:1         | 0.24 $\pm$ 0.21 | 4.56 $\pm$ 0.92 | 3.14 $\pm$ 0.65 | 6.86 $\pm$ 0.80 | 10.46 $\pm$ 2.05 | 10.75 $\pm$ 2.21 |
| 790.6              | 18:0-18:0         | 0.01 $\pm$ 0.01 | 0.01 $\pm$ 0.02 | 0.13 $\pm$ 0.18 | 0.17 $\pm$ 0.15 | 0.17 $\pm$ 0.05  | 0.17 $\pm$ 0.11  |
| 794.5              | P18:0-20:4        |                 | 0.01 $\pm$ 0.01 | 0.02 $\pm$ 0.02 | 0.04 $\pm$ 0.03 | 0.06 $\pm$ 0.02  | 0.05 $\pm$ 0.01  |
| 800.6              | P18:0-20:1        |                 | 0.07 $\pm$ 0.03 | 0.03 $\pm$ 0.01 | 0.03 $\pm$ 0.01 | 0.10 $\pm$ 0.04  | 0.02 $\pm$ 0.01  |
| 802.6              | P18:0-20:0        |                 | 0.17 $\pm$ 0.11 | 0.04 $\pm$ 0.01 | 0.08 $\pm$ 0.02 | 0.11 $\pm$ 0.03  | 0.08 $\pm$ 0.01  |
| 806.5              | 18:2-20:4         | 0.05 $\pm$ 0.03 | 0.03 $\pm$ 0.01 | 0.06 $\pm$ 0.03 | 0.08 $\pm$ 0.01 | 0.13 $\pm$ 0.03  | 0.04 $\pm$ 0.01  |
| 808.5              | 18:1-20:4         | 0.04 $\pm$ 0.04 | 0.04 $\pm$ 0.02 | 0.06 $\pm$ 0.06 | 0.09 $\pm$ 0.04 | 0.14 $\pm$ 0.03  | 0.13 $\pm$ 0.03  |
| 810.5              | 18:0-20:4         | 0.10 $\pm$ 0.08 | 0.32 $\pm$ 0.06 | 0.94 $\pm$ 0.17 | 0.58 $\pm$ 0.13 | 0.68 $\pm$ 0.10  | 1.82 $\pm$ 0.39  |
| 812.5              | 18:0-20:3         |                 | 0.22 $\pm$ 0.07 | 0.77 $\pm$ 0.25 | 0.65 $\pm$ 0.06 | 1.33 $\pm$ 0.32  | 1.26 $\pm$ 0.26  |
| 814.6              | 18:0-20:2         |                 | 0.08 $\pm$ 0.01 | 0.11 $\pm$ 0.05 | 0.16 $\pm$ 0.06 | 0.63 $\pm$ 0.19  | 0.10 $\pm$ 0.05  |
| 816.6              | 18:0-20:1         |                 | 0.13 $\pm$ 0.07 | 0.13 $\pm$ 0.06 | 0.08 $\pm$ 0.02 | 0.29 $\pm$ 0.05  | 0.16 $\pm$ 0.09  |
| 818.6              | 18:0-20:0         |                 | 0.05 $\pm$ 0.03 | 0.01 $\pm$ 0.02 | 0.01 $\pm$ 0.01 | 0.07 $\pm$ 0.01  | 0.02 $\pm$ 0.02  |
| 820.5              | P18:0-22:5        |                 | 0.04 $\pm$ 0.03 | 0.04 $\pm$ 0.04 | 0.06 $\pm$ 0.02 | 0.10 $\pm$ 0.02  | 0.03 $\pm$ 0.01  |
| 822.6              | P20:0-20:4        |                 | 0.02 $\pm$ 0.01 | 0.03 $\pm$ 0.01 | 0.06 $\pm$ 0.00 | 0.07 $\pm$ 0.03  | 0.03 $\pm$ 0.02  |
|                    | P18:0-22:4        |                 |                 |                 |                 |                  |                  |
| 824.6              | P20:0-20:3        |                 | 0.04 $\pm$ 0.05 | 0.03 $\pm$ 0.04 | 0.03 $\pm$ 0.02 | 0.03 $\pm$ 0.01  | 0.02 $\pm$ 0.01  |
|                    | P18:0-22:3        |                 |                 |                 |                 |                  |                  |
| 826.6              | P20:0-20:2        |                 | 0.08 $\pm$ 0.03 | 0.02 $\pm$ 0.03 | 0.09 $\pm$ 0.01 | 0.08 $\pm$ 0.03  | 0.05 $\pm$ 0.04  |
|                    | P18:0-22:2        |                 |                 |                 |                 |                  |                  |
| 828.6              | P20:0-20:1        |                 | 0.04 $\pm$ 0.04 | 0.01 $\pm$ 0.01 | 0.01 $\pm$ 0.01 | 0.04 $\pm$ 0.02  | 0.02 $\pm$ 0.02  |
|                    | P18:0-22:1        |                 |                 |                 |                 |                  |                  |
| 832.5              | 18:1-22:6         | 0.05 $\pm$ 0.01 | 0.06 $\pm$ 0.05 | 0.04 $\pm$ 0.03 | 0.08 $\pm$ 0.01 | 0.07 $\pm$ 0.01  | 0.09 $\pm$ 0.05  |
| 834.5              | 18:0-22:6         | 3.13 $\pm$ 1.22 | 0.33 $\pm$ 0.17 | 1.31 $\pm$ 0.34 | 1.71 $\pm$ 0.12 | 1.84 $\pm$ 0.46  | 3.01 $\pm$ 0.54  |
| 836.5              | 18:0-22:5         | 0.22 $\pm$ 0.27 | 0.14 $\pm$ 0.09 | 0.67 $\pm$ 0.05 | 1.42 $\pm$ 0.15 | 1.39 $\pm$ 0.36  | 2.20 $\pm$ 0.06  |
| 838.6              | 20:0-20:4         | 0.28 $\pm$ 0.07 | 0.21 $\pm$ 0.04 | 0.91 $\pm$ 0.18 | 0.82 $\pm$ 0.24 | 0.43 $\pm$ 0.11  | 1.80 $\pm$ 0.61  |
|                    | 18:0-22:4         |                 |                 |                 |                 |                  |                  |
| 840.6              | 20:0-20:3         |                 | 0.12 $\pm$ 0.02 | 0.06 $\pm$ 0.06 | 0.17 $\pm$ 0.05 | 0.15 $\pm$ 0.04  | 0.12 $\pm$ 0.08  |
|                    | 18:0-22:3         |                 |                 |                 |                 |                  |                  |
| 842.6              | 20:0-20:2         |                 | 0.13 $\pm$ 0.08 | 0.09 $\pm$ 0.14 | 0.06 $\pm$ 0.03 | 0.19 $\pm$ 0.12  | 0.16 $\pm$ 0.10  |
|                    | 18:0-22:2         |                 |                 |                 |                 |                  |                  |
| 844.6              | 20:0-20:1         |                 | 0.06 $\pm$ 0.04 | 0.17 $\pm$ 0.04 | 0.04 $\pm$ 0.01 | 0.17 $\pm$ 0.02  | 0.15 $\pm$ 0.02  |
|                    | 18:0-22:1         |                 |                 |                 |                 |                  |                  |
| 860.5              | 20:1-22:6         |                 | 0.04 $\pm$ 0.03 | 0.02 $\pm$ 0.03 | 0.01 $\pm$ 0.01 | 0.02 $\pm$ 0.00  | 0.02 $\pm$ 0.01  |
| 862.6              | 20:0-22:6         |                 |                 | 0.06 $\pm$ 0.04 | 0.04 $\pm$ 0.01 | 0.05 $\pm$ 0.02  | 0.08 $\pm$ 0.05  |
| 864.6              | 20:0-22:5         |                 | 0.06 $\pm$ 0.02 | 0.07 $\pm$ 0.03 | 0.01 $\pm$ 0.01 | 0.01 $\pm$ 0.01  | 0.07 $\pm$ 0.06  |
| 870.6              | 20:0-22:2         |                 | 0.05 $\pm$ 0.03 | 0.06 $\pm$ 0.02 | 0.02 $\pm$ 0.01 | 0.05 $\pm$ 0.03  | 0.05 $\pm$ 0.02  |
| 872.6              | 20:0-22:1         |                 | 0.02 $\pm$ 0.01 | 0.13 $\pm$ 0.10 | 0.01 $\pm$ 0.01 | 0.06 $\pm$ 0.00  | 0.13 $\pm$ 0.06  |
| 878.5              | 22:6-22:6         | 0.07 $\pm$ 0.01 |                 |                 |                 |                  |                  |
| 882.5              | 22:6-22:4         | 0.06 $\pm$ 0.07 |                 |                 |                 |                  |                  |

**Table S8** Mass content of lysophosphatidylcholine molecular species of mitochondria isolated from brain, brain tumour and cells  
Values are expressed as mean nmol/mg of protein  $\pm$  S.D. ( $n=3$ ).

| [M+Na] <sup>+</sup> | Molecular species | <i>In vivo</i>  |                 |                 | <i>In vitro</i> |                 |                 |
|---------------------|-------------------|-----------------|-----------------|-----------------|-----------------|-----------------|-----------------|
|                     |                   | Brain           | CT-2A           | EPEN            | Astrocyte       | CT-2A           | EPEN            |
| 490.3               | 14:0              | 0.06 $\pm$ 0.01 | 0.19 $\pm$ 0.02 | 0.12 $\pm$ 0.01 | 0.06 $\pm$ 0.01 | 0.05 $\pm$ 0.01 | 0.11 $\pm$ 0.07 |
| 504.3               | A16:0             | 0.06 $\pm$ 0.03 | 0.25 $\pm$ 0.02 | 0.14 $\pm$ 0.10 | 0.28 $\pm$ 0.02 | 0.53 $\pm$ 0.17 | 0.15 $\pm$ 0.03 |
| 516.3               | 16:1              | 0.09 $\pm$ 0.04 |                 |                 |                 |                 |                 |
| 518.3               | 16:0              | 0.89 $\pm$ 0.21 | 2.23 $\pm$ 0.27 | 0.93 $\pm$ 0.38 | 0.48 $\pm$ 0.04 | 0.86 $\pm$ 0.06 | 0.82 $\pm$ 0.15 |
| 542.3               | 18:2              | 0.06 $\pm$ 0.02 | 0.24 $\pm$ 0.02 | 0.10 $\pm$ 0.01 | 0.02 $\pm$ 0.01 | 0.02 $\pm$ 0.01 | 0.02 $\pm$ 0.01 |
| 544.3               | 18:1              | 0.41 $\pm$ 0.13 | 1.33 $\pm$ 0.06 | 0.39 $\pm$ 0.09 | 0.15 $\pm$ 0.00 | 0.26 $\pm$ 0.09 | 0.25 $\pm$ 0.09 |
| 546.4               | 18:0              | 0.32 $\pm$ 0.08 | 1.38 $\pm$ 0.29 | 0.68 $\pm$ 0.19 | 0.38 $\pm$ 0.07 | 0.48 $\pm$ 0.05 | 0.65 $\pm$ 0.05 |
| 566.3               | 20:4              | 0.16 $\pm$ 0.09 | 0.06 $\pm$ 0.00 | 0.08 $\pm$ 0.03 | 0.02 $\pm$ 0.02 |                 | 0.08 $\pm$ 0.05 |
| 568.3               | 20:3              | 0.02 $\pm$ 0.00 | 0.05 $\pm$ 0.01 | 0.05 $\pm$ 0.00 | 0.01 $\pm$ 0.01 |                 | 0.02 $\pm$ 0.01 |
| 570.4               | 20:2              | 0.03 $\pm$ 0.01 | 0.10 $\pm$ 0.04 | 0.10 $\pm$ 0.04 | 0.01 $\pm$ 0.01 |                 | 0.02 $\pm$ 0.02 |
| 572.4               | 20:1              | 0.04 $\pm$ 0.02 | 0.34 $\pm$ 0.14 | 0.09 $\pm$ 0.05 | 0.03 $\pm$ 0.01 | 0.04 $\pm$ 0.02 | 0.30 $\pm$ 0.24 |
| 574.4               | 20:0              | 0.04 $\pm$ 0.02 | 0.06 $\pm$ 0.03 | 0.04 $\pm$ 0.02 |                 |                 |                 |
| 590.3               | 22:6              | 0.24 $\pm$ 0.12 | 0.03 $\pm$ 0.01 | 0.08 $\pm$ 0.00 | 0.02 $\pm$ 0.01 |                 | 0.02 $\pm$ 0.02 |
| 592.3               | 22:5              | 0.08 $\pm$ 0.03 |                 |                 |                 |                 |                 |
| 594.4               | 22:4              | 0.04 $\pm$ 0.02 |                 |                 |                 |                 |                 |
| 596.4               | 22:3              | 0.03 $\pm$ 0.03 |                 |                 |                 |                 |                 |
| 598.4               | 22:2              | 0.01 $\pm$ 0.01 |                 |                 |                 |                 |                 |
| 600.4               | 22:1              | 0.04 $\pm$ 0.03 |                 |                 |                 |                 |                 |
| 602.4               | 22:0              | 0.02 $\pm$ 0.02 |                 |                 |                 |                 |                 |

**Table S9** Mass content of ceramide molecular species of mitochondria isolated from brain, brain tumour and cells  
Values are expressed as mean nmol/mg of protein  $\pm$  S.D. ( $n=3$ ).

| [M-H] <sup>-</sup> | Molecular species | <i>In vivo</i>  |                 |                 | <i>In vitro</i> |                 |                 |
|--------------------|-------------------|-----------------|-----------------|-----------------|-----------------|-----------------|-----------------|
|                    |                   | Brain           | CT-2A           | EPEN            | Astrocyte       | CT-2A           | EPEN            |
| 536.5              | N16:0             | 0.01 $\pm$ 0.01 | 0.54 $\pm$ 0.11 | 0.32 $\pm$ 0.10 | 0.16 $\pm$ 0.04 | 0.35 $\pm$ 0.19 | 0.67 $\pm$ 0.06 |
| 562.5              | N18:1             |                 | 0.02 $\pm$ 0.02 | 0.01 $\pm$ 0.01 |                 |                 | 0.01 $\pm$ 0.00 |
| 564.5              | N18:0             | 0.66 $\pm$ 0.15 | 0.15 $\pm$ 0.03 | 0.11 $\pm$ 0.01 | 0.03 $\pm$ 0.01 | 0.04 $\pm$ 0.02 | 0.19 $\pm$ 0.04 |
| 592.6              | N20:0             | 0.04 $\pm$ 0.02 | 0.06 $\pm$ 0.01 | 0.03 $\pm$ 0.01 | 0.01 $\pm$ 0.00 | 0.02 $\pm$ 0.00 | 0.03 $\pm$ 0.00 |
| 606.6              | N21:0             |                 | 0.01 $\pm$ 0.01 | 0.01 $\pm$ 0.00 |                 |                 |                 |
| 616.6              | N22:2             |                 | 0.01 $\pm$ 0.00 | 0.00 $\pm$ 0.01 |                 |                 |                 |
| 618.6              | N22:1             |                 | 0.06 $\pm$ 0.02 | 0.01 $\pm$ 0.01 | 0.01 $\pm$ 0.01 | 0.01 $\pm$ 0.00 | 0.01 $\pm$ 0.00 |
| 620.6              | N22:0             |                 | 0.15 $\pm$ 0.05 | 0.17 $\pm$ 0.03 | 0.11 $\pm$ 0.02 | 0.10 $\pm$ 0.06 | 0.17 $\pm$ 0.03 |
| 632.6              | N23:1             |                 | 0.02 $\pm$ 0.01 |                 | 0.02 $\pm$ 0.00 | 0.01 $\pm$ 0.01 | 0.01 $\pm$ 0.00 |
| 634.6              | N23:0             |                 | 0.02 $\pm$ 0.00 | 0.02 $\pm$ 0.01 | 0.03 $\pm$ 0.01 | 0.02 $\pm$ 0.00 | 0.03 $\pm$ 0.01 |
| 644.6              | N24:2             |                 | 0.09 $\pm$ 0.02 | 0.07 $\pm$ 0.02 | 0.02 $\pm$ 0.00 | 0.01 $\pm$ 0.01 | 0.02 $\pm$ 0.00 |
| 646.6              | N24:1             | 0.02 $\pm$ 0.02 | 0.71 $\pm$ 0.08 | 0.51 $\pm$ 0.03 | 0.23 $\pm$ 0.01 | 0.25 $\pm$ 0.12 | 0.36 $\pm$ 0.04 |
| 648.6              | N24:0             | 0.02 $\pm$ 0.00 | 0.17 $\pm$ 0.07 | 0.41 $\pm$ 0.08 | 0.23 $\pm$ 0.04 | 0.15 $\pm$ 0.07 | 0.42 $\pm$ 0.05 |
| 660.6              | OH_N24:2          |                 | 0.03 $\pm$ 0.01 | 0.01 $\pm$ 0.01 |                 |                 |                 |
| 662.6              | OH_N24:1          |                 | 0.01 $\pm$ 0.00 | 0.01 $\pm$ 0.01 | 0.01 $\pm$ 0.00 |                 |                 |
| 664.6              | OH_N24:0          |                 | 0.02 $\pm$ 0.02 | 0.01 $\pm$ 0.01 | 0.01 $\pm$ 0.00 |                 | 0.01 $\pm$ 0.00 |
| 674.6              | N26:1             |                 | 0.03 $\pm$ 0.01 | 0.01 $\pm$ 0.00 | 0.01 $\pm$ 0.00 | 0.01 $\pm$ 0.00 | 0.01 $\pm$ 0.00 |
| 676.7              | N26:0             |                 | 0.01 $\pm$ 0.01 |                 |                 | 0.01 $\pm$ 0.00 |                 |
| 678.6              | OH_N25:0          |                 | 0.01 $\pm$ 0.01 |                 |                 |                 |                 |
| 700.7              | N28:2             |                 | 0.04 $\pm$ 0.00 |                 | 0.01 $\pm$ 0.00 | 0.01 $\pm$ 0.00 | 0.04 $\pm$ 0.00 |
| 702.7              | N28:1             |                 | 0.04 $\pm$ 0.01 |                 | 0.01 $\pm$ 0.00 | 0.01 $\pm$ 0.00 | 0.01 $\pm$ 0.00 |
| 704.7              | N28:0             |                 | 0.02 $\pm$ 0.02 |                 |                 | 0.01 $\pm$ 0.00 |                 |

Received 19 February 2009/30 April 2009; accepted 6 May 2009

Published as Immediate Publication 6 May 2009, doi 10.1042/AN20090011
